# Supplementary material for: Plastic and Placenta: Identification of Polyethylene Glycol (PEG) Compounds in the Human Placenta by HPLC-MS/MS System
Source: MDPI journal article supplement (doi:10.3390/ijms232112743), 2022-10-22
Supplement: s1 [file s1]

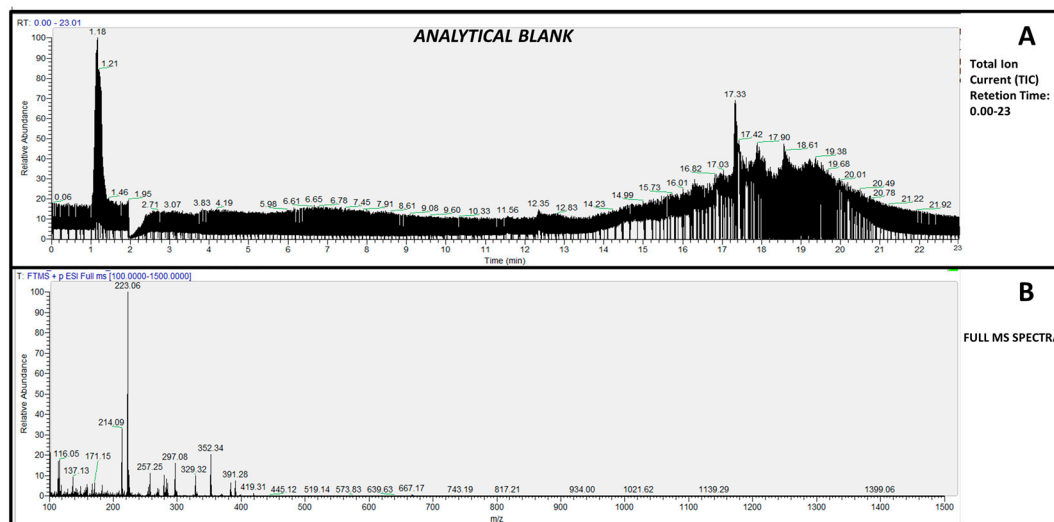

**Figure S1.** **A** represents the TIC of the analytical blank represented by a mixture of water and 5% formic acid inside of glass vials (the same buffer used for the analysis all the samples). **B** represents the spectrum in ms/ms at RT 9.2 min of the analytical blank. The analytical blanks were analyzed, before carrying out the analyzes of the 36 samples and between one sample and the next.

**Table S1.** Identification of PEG polymers, 4 to 10 ethylene oxide monomers (EO-4 to EO-10) by HPLCS-MS / MS

| MEASURED<br>MASS | PUTATIVE FORMULA                                | PUTATIVE IDENTIFICATION | CALCULATED<br>EXACT MASS |
|------------------|-------------------------------------------------|-------------------------|--------------------------|
| 195.1228         | C <sub>8</sub> H <sub>18</sub> O <sub>5</sub>   | PEG-EO4                 | 195.1227                 |
| 239.1489         | C <sub>10</sub> H <sub>22</sub> O <sub>6</sub>  | PEG-EO5                 | 239.1489                 |
| 283.1752         | C <sub>12</sub> H <sub>26</sub> O <sub>7</sub>  | PEG-EO6                 | 283.1751                 |
| 327.2018         | C <sub>14</sub> H <sub>30</sub> O <sub>8</sub>  | PEG-EO7                 | 327.2013                 |
| 371.2284         | C <sub>16</sub> H <sub>34</sub> O <sub>9</sub>  | PEG-EO8                 | 371.2276                 |
| 415.2542         | C <sub>18</sub> H <sub>38</sub> O <sub>10</sub> | PEG-EO9                 | 415.2538                 |
| 459.2801         | C <sub>20</sub> H <sub>42</sub> O <sub>11</sub> | PEG-EO10                | 459.2800                 |
